# Supplementary material
Source: Springer Nature journal article supplement (https://www.springermedizin.de/resource/supplementary/11689_2013_72_MOESM5_ESM.pdf/9673180)
Supplement: MOESM5 [file 9673180]

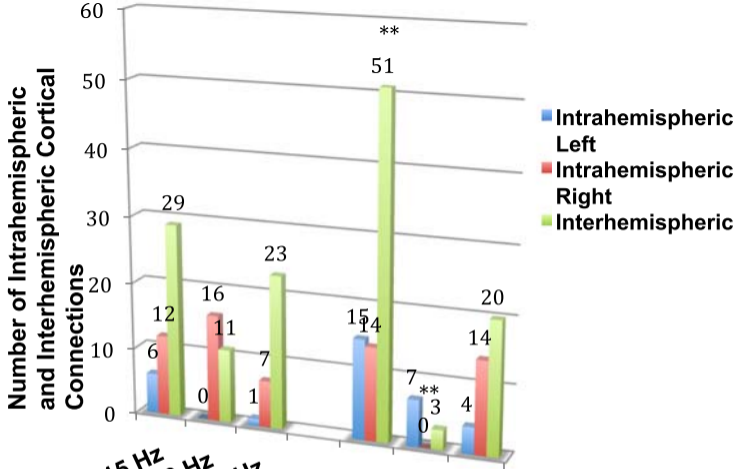

Higher Coherence in NT 0-15 Hz  
 Higher Coherence in NT 15-30 Hz  
 Higher Coherence in NT 30-45 Hz  
 Higher Coherence in ASD 0-15 Hz  
 Higher Coherence in ASD 15-30 Hz  
 Higher Coherence in ASD 30-45 Hz
